# Supplementary material
Source: publisher figshare collection journal article supplement (https://tandf.figshare.com/ndownloader/files/15025703)
Supplement: Supplementary file 1 [file 15025703]

Supplementary material 1: Search Terms

| Search terms | |
| --- | --- |
|  | **Search terms** |
| 1. Health problems | hyperlipi*  hypertension  cardiovascular  heart rate variability  HRV  cholesterol  triglyceride  Low density lipoprotein  High density lipoprotein  HDL  LDL  high sensitivity c-reactive protein  hs crp  hscrp  blood pressure  coronary  heart disease  blood disease  inflammation  smoking  diabetes  obes*  interleukin  interferon  tumor necrosis factor  body mass index  tobacco  myocardial infarction |
| 1. Military search terms | vetera*  ex-serving  armed forces  military  soldier  officer  combat  ex-military |
| 1. Iraq/Afghanistan deployed | Iraq  Afghanistan  Herrick  telic  operation enduring freedom  operation Iraqi freedom  operation new dawn |
| 1. PTSD | PTSD  PTSS  post traumatic stress |
| 1. Limits | 2001-Current  human  English language  Full text |

(((PTSD) OR PTSS) OR post traumatic stress) AND ((((((((((((((((((((((((((((((hyperlipi*) OR hypertension) OR cardiovascular) OR cholesterol) OR triglyceride) OR hs crp) OR hscrp) OR blood pressure) OR coronary) OR heart disease) OR blood disease) OR high sensitivity c-reactive protein) OR heart rate variability) OR HRV) OR dyslipi*) OR low density lipoprotein) OR high density lipoprotein) OR HDL) OR LDL) OR inflammation) OR smoking) OR diabetes) OR obes*) OR interleukin) OR interferon) OR tumor necrosis factor) OR body mass index) OR tobacco) OR myocardial infarction)) AND ((((((((vetera*) OR ex-serving) OR armed forces) OR military) OR solider) OR officer) OR combat) OR ex-military) AND (((((((iraq) OR afghanistan) OR herrick) OR telic) OR operation enduring freedom) OR operation iraqi freedom) OR operation new dawn
